# Supplementary material
Source: PubMed Central journal article supplement (PMC3071429)
Supplement: NIHMS265069-supplement-01.pdf [file NIHMS265069-supplement-01.pdf]

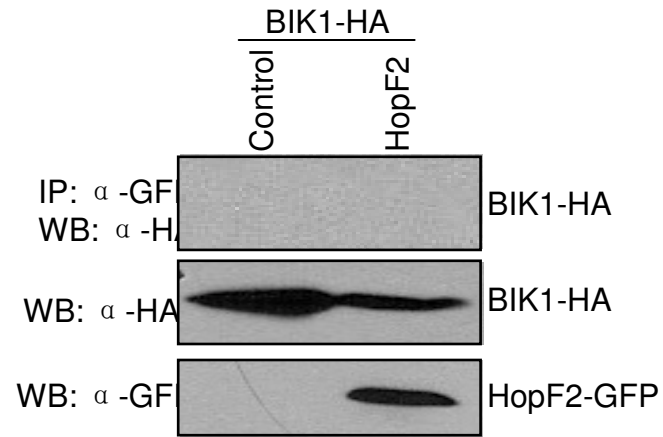

**Fig. S1. HopF2 did not interact with BIK1.** Co-immunoprecipitation (Co-IP) was performed with protoplasts co-expressing BIK1-HA and HopF2-GFP. The Co-IP was carried out with anti-GFP (IP:  $\alpha$ -GFP), and the proteins were analyzed using Western blot with anti-HA antibody (WB:  $\alpha$ -HA). The top panel shows Co-IP results, and the middle and bottom panels show protein expression.

Fig. S1

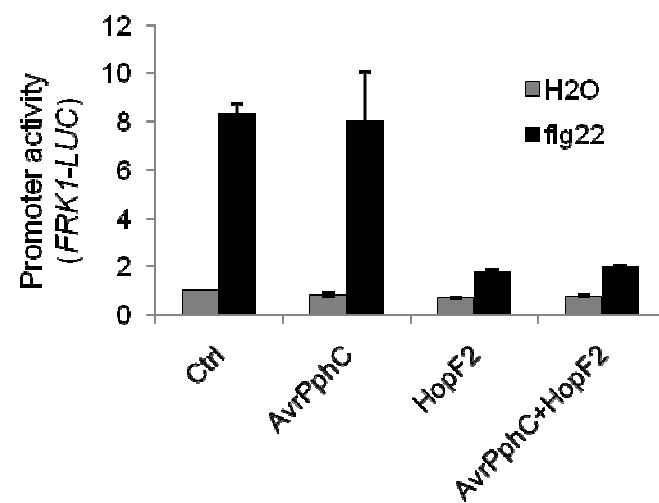

**Fig. S2. AvrPphC did not interfere with HopF2 MAMP suppression activity.** Protoplasts were transfected with control DNA, AvrPphC, HopF2 or AvrPphC and HopF2. Three hours later, transfected protoplasts were treated with 10 nM flg22 for another 3 hr.
